# Supplementary material for: Effects of Time of Pruning and Plant Bio-Regulators on the Growth, Yield, Fruit Quality, and Post-Harvest Losses of Ber (Ziziphus mauritiana)
Source: MDPI journal article supplement (doi:10.3390/horticulturae8090809), 2022-09-03
Supplement: s1 [file s1]

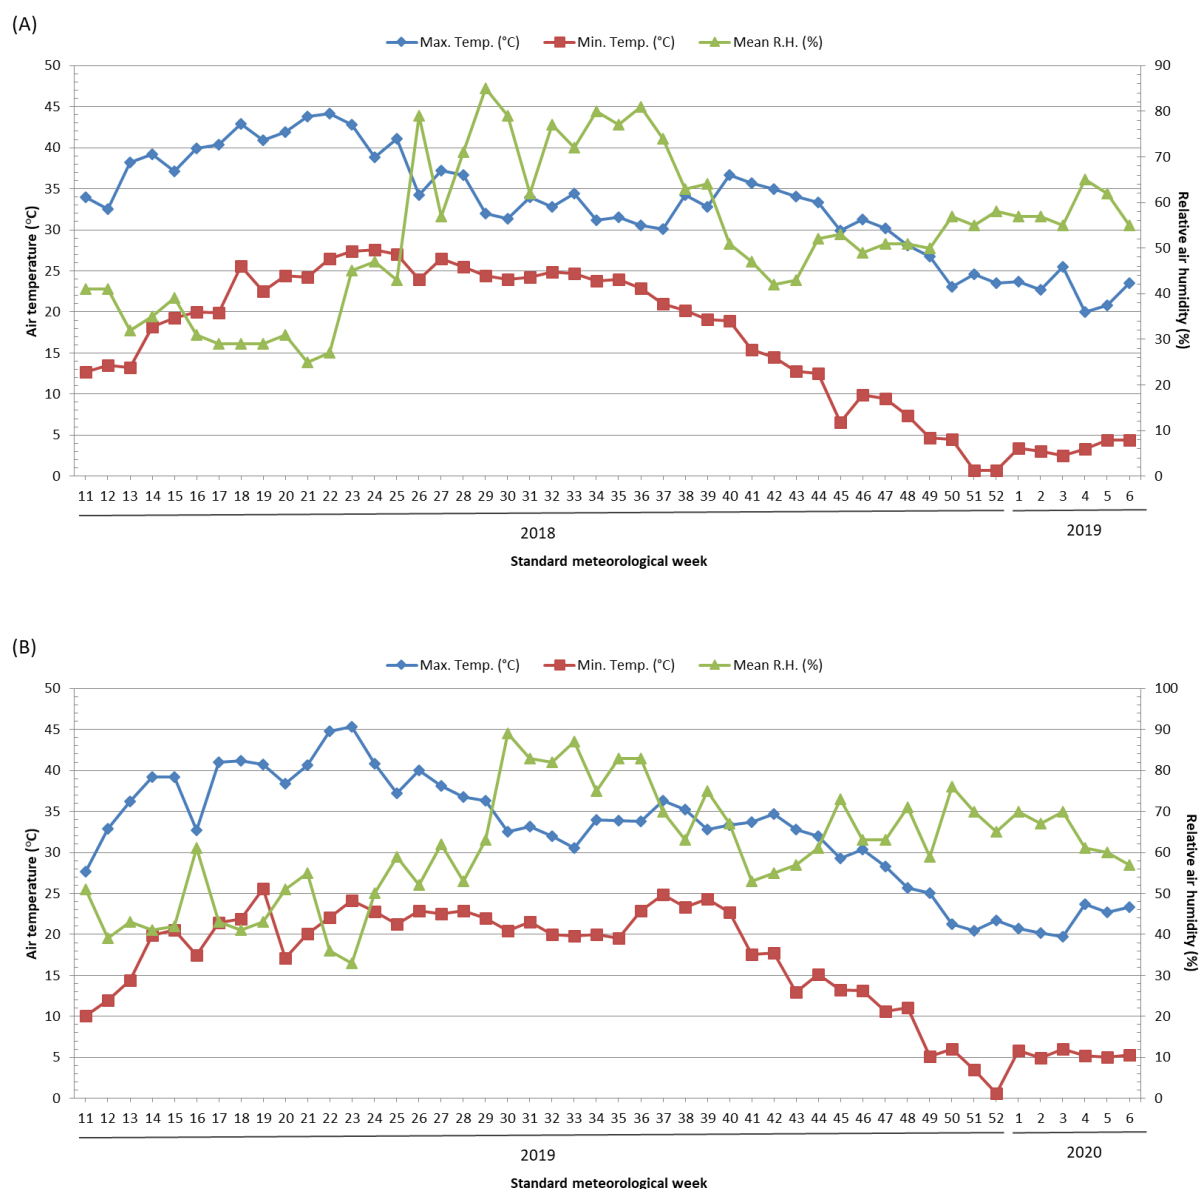

**Supplementary Figure S1.** Minimum and maximum air temperatures and relative air humidity in the growing seasons 2018-2019 (A) and 2019-2020 (B).
