# Supplementary material for: Effects of Time of Pruning and Plant Bio-Regulators on the Growth, Yield, Fruit Quality, and Post-Harvest Losses of Ber (Ziziphus mauritiana)
Source: MDPI journal article supplement (doi:10.3390/horticulturae8090809), 2022-09-03
Supplement: s1 [file s1]

Archive with 1 entries (1 files):
- horticulturae-1859564-supplementary.pdf
